# Supplementary material
Source: PubMed Central journal article supplement (PMC5847652)
Supplement: JB.00576-17_zjb999094667s1.pdf [file JB.00576-17_zjb999094667s1.pdf]

## Supplemental Material

Supplementary Table S1. Oligonucleotides used in this study.

| NO.  | SEQUENCE (5' TO 3')                                       | DESCRIPTION                                                 |
|------|-----------------------------------------------------------|-------------------------------------------------------------|
| 379  | AGGCAAGTATTCCTGTGCGC                                      | <i>gyrA</i> Fwd                                             |
| 380  | CTGGTACTCACCCAGCAGTTTT                                    | <i>gyrA</i> Rev                                             |
| 381  | CCGCAAGGTGATTATCTCAGC                                     | <i>gap-1</i> Fwd                                            |
| 382  | TGGAGATGATCTGGTGCGACT                                     | <i>gap-1</i> Rev                                            |
| 2432 | GCGTTAACGCTAGCATGGATGT                                    | pEnterD Fwd                                                 |
| 2433 | CCAGGAAACAGCTATGACCATGTAA                                 | pEnterD Rev                                                 |
| 6872 | TCTCTCCTGTTCCAGCCA                                        | <i>fleQas</i> Fwd                                           |
| 6873 | CTGACGTTCCCGACCAG                                         | <i>fleQas</i> Rev                                           |
| 6874 | CTCTCCGCGCTCGAAAT                                         | <i>fleQ</i> Fwd                                             |
| 6875 | GGCCTGATCGTACATTTAC                                       | <i>fleQ</i> Rev                                             |
| 6900 | GCGGGTACGAACCAAGTGT                                       | <i>gyrA</i> RT                                              |
| 6902 | AGCGGGTTGTGATTGAAGT                                       | <i>gap-1</i> RT                                             |
| 6904 | GCGCCTGCTGAATCAGA                                         | <i>fleQ</i> RT                                              |
| 6906 | AAATCTCTCCTGTTCCAGCC                                      | <i>fleQas</i> RT                                            |
| 6910 | CTGTTCCAGCCAGGACTGGCAGCAGGT                               | 5' RACE GSP2 <i>fleQas</i>                                  |
| 6911 | GGCTCTTTGGCGTCCACGCGAGAGGT                                | 5' RACE GSP nested <i>fleQas</i>                            |
| 6912 | GTTCCCGACCAGCACGCA                                        | 3'RACE GSP2 <i>fleQas</i>                                   |
| 6913 | GCACAGAACCTCTCGCGTGGA                                     | 3'RACE GSP nested <i>fleQas</i>                             |
| 6914 | CATGCGGCCGCTAAGAACAGT                                     | 3' RACE Gene Specific<br>Adapter <i>fleQas</i>              |
| 6915 | 5 <sup>phos</sup> UUCACUGUUCUUAGCGGCCGCAUGC<br>UC 3' rvdT | 3' RACE RNA Adapter <i>fleQas</i>                           |
| 6916 | CACCCGCGGGCCTGATCGTACA                                    | Cloning <i>fleQas</i> Promoter                              |
| 6917 | GTGCTGGTCGGGAACGTCA                                       | <i>fleQas</i> Promoter cloning                              |
| 6922 | ATTATCTAGAGCGAAGTTCGGTGTGTTGCTGT                          | <i>fleQas</i> promoter mutagenesis<br>Fwd PCR1 Flank A      |
| 6923 | ATCCCATGCCGCGATGGTTTTAAGAAGCCC<br>TTGCAGGCT               | <i>fleQas</i> promoter mutagenesis<br>Rev PCR1 Flank A PCR1 |
| 6924 | ATCCCATGCCGCGATGGTTTTAAGAAGCCC<br>TTGCAGGCT               | <i>fleQas</i> promoter Fwd PCR1<br>Flank B                  |
| 6925 | ATTATCTAGAGGCCTGGACCGTATCGCTCA                            | <i>fleQas</i> promoter mutagenesis<br>Rev PCR1 Flank B      |

**Table S2.** List of 54 large and small ribosome subunit proteins of Pst DC3000 used for core genome analysis and their frequency of occurrence in the 339 *Pseudomonas* genomes used in this study (listed in Table S3). The loci used in phylogenetic reconstruction (Figure 5, main text) are labelled with a 'Y'.

| <b>Locus</b>   | <b>Sequence length</b> | <b>Isolate frequency</b> | <b>Isolate percentage (%)</b> |   |
|----------------|------------------------|--------------------------|-------------------------------|---|
| PSPTO0089 rpmB | 234                    | 339                      | 99.7                          | - |
| PSPTO0090 rpmG | 156                    | 338                      | 99.4                          | - |
| PSPTO0615 rplK | 432                    | 339                      | 99.7                          | - |
| PSPTO0616 rplA | 696                    | 339                      | 99.7                          | - |
| PSPTO0617 rplJ | 501                    | 339                      | 99.7                          | - |
| PSPTO0618 rplL | 366                    | 339                      | 99.7                          | - |
| PSPTO0625 rpsJ | 312                    | 340                      | 100                           | Y |
| PSPTO0626 rplC | 636                    | 340                      | 100                           | Y |
| PSPTO0627 rplD | 603                    | 340                      | 100                           | Y |
| PSPTO0628 rplW | 300                    | 340                      | 100                           | Y |
| PSPTO0629 rplB | 825                    | 340                      | 100                           | Y |
| PSPTO0630 rpsS | 276                    | 340                      | 100                           | Y |
| PSPTO0631 rplV | 333                    | 340                      | 100                           | Y |
| PSPTO0632 rpsC | 687                    | 340                      | 100                           | Y |
| PSPTO0633 rplP | 414                    | 340                      | 100                           | Y |
| PSPTO0634 rpmC | 192                    | 339                      | 99.7                          | - |
| PSPTO0635 rpsQ | 267                    | 340                      | 100                           | Y |
| PSPTO0636 rplN | 369                    | 340                      | 100                           | Y |
| PSPTO0637 rplX | 315                    | 339                      | 99.7                          | - |
| PSPTO0638 rplE | 540                    | 340                      | 100                           | Y |
| PSPTO0639 rpsN | 306                    | 336                      | 98.8                          | - |
| PSPTO0640 rpsH | 393                    | 340                      | 100                           | Y |
| PSPTO0641 rplF | 534                    | 340                      | 100                           | Y |
| PSPTO0642 rplR | 351                    | 340                      | 100                           | Y |
| PSPTO0643 rpsE | 501                    | 340                      | 100                           | Y |
| PSPTO0644 rpmD | 177                    | 212                      | 62.4                          | - |
| PSPTO0645 rplO | 435                    | 336                      | 98.8                          | - |
| PSPTO0647 rpmJ | 117                    | 338                      | 99.4                          | - |
| PSPTO0648 rpsM | 357                    | 340                      | 100                           | Y |
| PSPTO0649 rpsK | 390                    | 340                      | 100                           | Y |
| PSPTO0650 rpsD | 621                    | 340                      | 100                           | Y |
| PSPTO0652 rplQ | 387                    | 340                      | 100                           | Y |

|                |      |     |      |   |
|----------------|------|-----|------|---|
| PSPTO0797 rplU | 312  | 340 | 100  | Y |
| PSPTO0798 rpmA | 276  | 338 | 99.4 | - |
| PSPTO1103 rplY | 612  | 335 | 98.5 | - |
| PSPTO1476 rplS | 351  | 337 | 99.1 | - |
| PSPTO2380 rpmI | 195  | 337 | 99.1 | - |
| PSPTO2381 rplT | 357  | 340 | 100  | Y |
| PSPTO3835 rpmF | 183  | 340 | 100  | Y |
| PSPTO4425 rpsI | 393  | 340 | 100  | Y |
| PSPTO4426 rplM | 429  | 340 | 100  | Y |
| PSPTO4930 rplI | 447  | 339 | 99.7 | - |
| PSPTO5136 rpmE | 228  | 301 | 88.5 | - |
| PSPTO5615 rpmH | 135  | 334 | 98.2 | - |
| PSPTO0539 rpsU | 216  | 340 | 100  | Y |
| PSPTO0621 rpsL | 372  | 338 | 99.4 | - |
| PSPTO0622 rpsG | 471  | 339 | 99.7 | - |
| PSPTO0802 rpsT | 279  | 337 | 99.1 | - |
| PSPTO1473 rpsP | 258  | 301 | 88.5 | - |
| PSPTO1534 rpsB | 744  | 340 | 100  | Y |
| PSPTO1750 rpsA | 1692 | 340 | 100  | Y |
| PSPTO4487 rpsO | 270  | 340 | 100  | Y |
| PSPTO4932 rpsR | 231  | 340 | 100  | Y |
| PSPTO4933 rpsF | 426  | 340 | 100  | Y |

**Table S3.** List of strains used for phylogenomics

| Strain                                          | NCBI assembly ID |
|-------------------------------------------------|------------------|
| <b>Pseudomonas fluorescens F113</b>             | GCA_000237065.1  |
| <b>Pseudomonas aeruginosa PAO1</b>              | GCA_000006765.1  |
| <b>Pseudomonas syringae pv. syringae B728a</b>  | GCA_000012245.1  |
| <b>Pseudomonas entomophila L48</b>              | GCA_000026105.1  |
| <b>Pseudomonas stutzeri 28a24</b>               | GCA_000590475.1  |
| <b>Pseudomonas mendocina ymp</b>                | GCA_000016565.1  |
| <b>Pseudomonas amygdali pv. lachrymans NM02</b> | GCA_002068135.1  |
| <b>Pseudomonas fulva 12-X</b>                   | GCA_000213805.1  |

---

|                                                                |                 |
|----------------------------------------------------------------|-----------------|
| <b>Pseudomonas brassicacearum subsp. brassicacearum NFM421</b> | GCA_000194805.1 |
| <b>Pseudomonas pseudoalcaligenes CECT 5344</b>                 | GCA_000297075.2 |
| <b>Pseudomonas viridiflava CFBP 1590</b>                       | GCA_900184295.1 |
| <b>Pseudomonas monteilii USDA-ARS-USMARC-56711</b>             | GCA_001534745.1 |
| <b>Pseudomonas fragi P121</b>                                  | GCA_001543265.1 |
| <b>Pseudomonas chlororaphis PA23</b>                           | GCA_000698865.1 |
| <b>Pseudomonas knackmussii B13</b>                             | GCA_000689415.1 |
| <b>Pseudomonas sp. UW4</b>                                     | GCA_000316175.1 |
| <b>Pseudomonas alcaliphila JAB1</b>                            | GCA_001941865.1 |
| <b>Pseudomonas alcaligenes NEB 585</b>                         | GCA_001597285.1 |
| <b>Pseudomonas azotoformans S4</b>                             | GCA_001579805.1 |
| <b>Pseudomonas cremoricolorata ND07</b>                        | GCA_000759535.1 |
| <b>Pseudomonas oryzihabitans USDA-ARS-USMARC-56511</b>         | GCA_001518815.1 |
| <b>Pseudomonas parafulva CRS01-1</b>                           | GCA_000800255.1 |
| <b>Pseudomonas plecoglossicida NyZ12</b>                       | GCA_000831585.1 |
| <b>Pseudomonas protegens CHA0</b>                              | GCA_000397205.1 |
| <b>Pseudomonas poae RE*1-1-14</b>                              | GCA_000336465.1 |
| <b>Pseudomonas veronii R02</b>                                 | GCA_002028325.1 |
| <b>Pseudomonas mosselii SJ10</b>                               | GCA_000498975.2 |
| <b>Pseudomonas cichorii JBC1</b>                               | GCA_000517305.1 |
| <b>Pseudomonas corrugata RM1-1-4</b>                           | GCA_001708425.1 |
| <b>Pseudomonas protegens Pf-5</b>                              | GCA_000012265.1 |
| <b>Pseudomonas alkylphenolica KL28</b>                         | GCA_000746525.1 |
| <b>Pseudomonas rhizosphaerae DSM 16299</b>                     | GCA_000761155.1 |
| <b>Pseudomonas balearica DSM 6083</b>                          | GCA_000818015.1 |
| <b>Pseudomonas trivialis IHBB745</b>                           | GCA_001186335.1 |
| <b>Pseudomonas koreensis D26</b>                               | GCA_001605965.1 |
| <b>Pseudomonas versuta L10.10</b>                              | GCA_001294575.1 |
| <b>Pseudomonas koreensis CRS05-R5</b>                          | GCA_001654515.1 |
| <b>Pseudomonas protegens Cab57</b>                             | GCA_000828695.1 |
| <b>Pseudomonas parafulva PRS09-11288</b>                       | GCA_002021815.1 |
| <b>Pseudomonas citronellolis P3B5</b>                          | GCA_001586155.1 |
| <b>Pseudomonas azotoformans F77</b>                            | GCA_002007785.1 |
| <b>Pseudomonas sp. ATCC 13867</b>                              | GCA_000349845.1 |
| <b>Pseudomonas chlororaphis subsp. Aurantiaca JD37</b>         | GCA_000761195.1 |
| <b>Pseudomonas monteilii SB3078</b>                            | GCA_000510285.1 |
| <b>Pseudomonas pseudoalcaligenes CECT5344</b>                  | GCA_000953455.1 |
| <b>Pseudomonas brassicacearum DF41</b>                         | GCA_000585995.1 |
| <b>Pseudomonas savastanoi pv. savastanoi NCPPB 3335</b>        | GCA_000164015.3 |

---

---

|                                                |                 |
|------------------------------------------------|-----------------|
| <b>Pseudomonas mendocina NK-01</b>             | GCA_000204295.1 |
| <b>Pseudomonas stutzeri CGMCC 1.1803</b>       | GCA_000219605.1 |
| <b>Pseudomonas aeruginosa UCBPP-PA14</b>       | GCA_000014625.1 |
| <b>Pseudomonas putida KT2440</b>               | GCA_000007565.2 |
| <b>Pseudomonas fluorescens SBW25</b>           | GCA_000009225.1 |
| <b>Pseudomonas fluorescens Pf0-1</b>           | GCA_000012445.1 |
| <b>Pseudomonas putida F1</b>                   | GCA_000016865.1 |
| <b>Pseudomonas aeruginosa PA7</b>              | GCA_000017205.1 |
| <b>Pseudomonas stutzeri A1501</b>              | GCA_000013785.1 |
| <b>Pseudomonas brassicacearum</b>              | GCA_001449085.1 |
| <b>Pseudomonas monteilii SB3101</b>            | GCA_000510325.1 |
| <b>Pseudomonas protegens H78</b>               | GCA_002006545.1 |
| <b>Pseudomonas protegens FDAARGOS_307</b>      | GCA_002208745.1 |
| <b>Pseudomonas sp. TKP</b>                     | GCA_000508205.1 |
| <b>Pseudomonas chlororaphis UFB2</b>           | GCA_001023535.1 |
| <b>Pseudomonas brassicacearum L13-6-12</b>     | GCA_001746815.1 |
| <b>Pseudomonas stutzeri DSM 4166</b>           | GCA_000195105.1 |
| <b>Pseudomonas aeruginosa LESB58</b>           | GCA_000026645.1 |
| <b>Pseudomonas putida GB-1</b>                 | GCA_000019125.1 |
| <b>Pseudomonas fluorescens NCIMB 11764</b>     | GCA_000293885.3 |
| <b>Pseudomonas putida W619</b>                 | GCA_000019445.1 |
| <b>Pseudomonas aeruginosa AES-1R</b>           | GCA_000220025.3 |
| <b>Pseudomonas stutzeri CCUG 29243</b>         | GCA_000267545.1 |
| <b>Pseudomonas chlororaphis 189</b>            | GCA_001602135.1 |
| <b>Pseudomonas sp. FGI182</b>                  | GCA_000511325.1 |
| <b>Pseudomonas sp. StFLB209</b>                | GCA_000829415.1 |
| <b>Pseudomonas stutzeri DSM 10701</b>          | GCA_000279165.1 |
| <b>Pseudomonas aeruginosa M18</b>              | GCA_000226155.1 |
| <b>Pseudomonas putida BIRD-1</b>               | GCA_000183645.1 |
| <b>Pseudomonas fluorescens UK4</b>             | GCA_000730425.1 |
| <b>Pseudomonas fluorescens PCL1751</b>         | GCA_000934565.1 |
| <b>Pseudomonas putida S16</b>                  | GCA_000219705.1 |
| <b>Pseudomonas aeruginosa DK2</b>              | GCA_000271365.1 |
| <b>Pseudomonas syringae pv. syringae B301D</b> | GCA_000988485.1 |
| <b>Pseudomonas sp. CCOS 191</b>                | GCA_001007005.1 |
| <b>Pseudomonas aeruginosa SJTD-1</b>           | GCA_000271985.2 |
| <b>Pseudomonas putida B6-2</b>                 | GCA_000226035.3 |
| <b>Pseudomonas fluorescens PICF7</b>           | GCA_000963495.1 |
| <b>Pseudomonas fluorescens LBUM223</b>         | GCA_000968415.1 |
| <b>Pseudomonas aeruginosa NCGM2.S1</b>         | GCA_000284555.1 |

---

---

|                                           |                 |
|-------------------------------------------|-----------------|
| <b>Pseudomonas syringae pv. lapsa</b>     | GCA_001482725.1 |
| <b>Pseudomonas stutzeri SLG510A3-8</b>    | GCA_001038645.1 |
| <b>Pseudomonas sp. BS-2016</b>            | GCA_001020725.2 |
| <b>Pseudomonas stutzeri 273</b>           | GCA_001648195.1 |
| <b>Pseudomonas aeruginosa B136-33</b>     | GCA_000359505.1 |
| <b>Pseudomonas putida SJTE-1</b>          | GCA_000271965.2 |
| <b>Pseudomonas fluorescens FW300-N2E3</b> | GCA_001307155.1 |
| <b>Pseudomonas fluorescens FW300-N2C3</b> | GCA_001307275.1 |
| <b>Pseudomonas aeruginosa RP73</b>        | GCA_000414035.1 |
| <b>Pseudomonas sp. URMO17WK12-I11</b>     | GCA_001511775.1 |
| <b>Pseudomonas sp. Os17</b>               | GCA_001547895.1 |
| <b>Pseudomonas aeruginosa VRFPA04</b>     | GCA_000473745.3 |
| <b>Pseudomonas putida H8234</b>           | GCA_000410575.1 |
| <b>Pseudomonas fluorescens LBUM636</b>    | GCA_001612705.1 |
| <b>Pseudomonas fluorescens L321</b>       | GCA_001708445.1 |
| <b>Pseudomonas putida NBRC 14164</b>      | GCA_000412675.1 |
| <b>Pseudomonas aeruginosa DHS01</b>       | GCA_000496455.2 |
| <b>Pseudomonas sp. St29</b>               | GCA_001547915.1 |
| <b>Pseudomonas sp. MS586</b>              | GCA_001594225.1 |
| <b>Pseudomonas aeruginosa PA1</b>         | GCA_000496605.2 |
| <b>Pseudomonas fluorescens L111</b>       | GCA_001708465.1 |
| <b>Pseudomonas putida S13.1.2</b>         | GCA_000498395.3 |
| <b>Pseudomonas aeruginosa PA1R</b>        | GCA_000496645.1 |
| <b>Pseudomonas sp. JY-Q</b>               | GCA_001655295.1 |
| <b>Pseudomonas sp. DR 5-09</b>            | GCA_001655595.1 |
| <b>Pseudomonas aeruginosa MTB-1</b>       | GCA_000504045.1 |
| <b>Pseudomonas putida DLL-E4</b>          | GCA_000691565.1 |
| <b>Pseudomonas fluorescens Pt14</b>       | GCA_001747385.1 |
| <b>Pseudomonas putida 1A00316</b>         | GCA_001515585.2 |
| <b>Pseudomonas aeruginosa LES431</b>      | GCA_000508765.1 |
| <b>Pseudomonas sp. GR 6-02</b>            | GCA_001655615.1 |
| <b>Pseudomonas sp. A3-2016</b>            | GCA_001661075.1 |
| <b>Pseudomonas aeruginosa SCV20265</b>    | GCA_000510305.1 |
| <b>Pseudomonas putida PC2</b>             | GCA_001636055.1 |
| <b>Pseudomonas putida JB</b>              | GCA_001767335.1 |
| <b>Pseudomonas aeruginosa YL84</b>        | GCA_000524595.1 |
| <b>Pseudomonas sp. CC6-YY-74</b>          | GCA_002025205.1 |
| <b>Pseudomonas aeruginosa F22031</b>      | GCA_000816985.1 |
| <b>Pseudomonas putida PP112420</b>        | GCA_001886975.1 |
| <b>Pseudomonas putida AA7</b>             | GCA_002025705.1 |

---

---

|                                                     |                 |
|-----------------------------------------------------|-----------------|
| <b>Pseudomonas aeruginosa NCGM 1984</b>             | GCA_000829255.1 |
| <b>Pseudomonas sp. LPH1</b>                         | GCA_002037565.1 |
| <b>Pseudomonas sp. S-6-2</b>                        | GCA_002056295.1 |
| <b>Pseudomonas aeruginosa NCGM 1900</b>             | GCA_000829275.1 |
| <b>Pseudomonas aeruginosa FRD1</b>                  | GCA_000829885.1 |
| <b>Pseudomonas sp. M30-35</b>                       | GCA_002163625.1 |
| <b>Pseudomonas aeruginosa Carb01 63</b>             | GCA_000981825.1 |
| <b>Pseudomonas aeruginosa DSM 50071</b>             | GCA_001045685.1 |
| <b>Pseudomonas aeruginosa F9676</b>                 | GCA_001077475.1 |
| <b>Pseudomonas aeruginosa PA1RG</b>                 | GCA_001293085.1 |
| <b>Pseudomonas aeruginosa VA-134</b>                | GCA_001447845.1 |
| <b>Pseudomonas aeruginosa NCTC10332</b>             | GCA_001457615.1 |
| <b>Pseudomonas aeruginosa 12-4-4-59</b>             | GCA_001482325.1 |
| <b>Pseudomonas aeruginosa S86968</b>                | GCA_001515845.2 |
| <b>Pseudomonas aeruginosa T38079</b>                | GCA_001515915.2 |
| <b>Pseudomonas aeruginosa T52373</b>                | GCA_001516005.1 |
| <b>Pseudomonas aeruginosa T63266</b>                | GCA_001516105.1 |
| <b>Pseudomonas aeruginosa W16407</b>                | GCA_001516165.2 |
| <b>Pseudomonas aeruginosa W36662</b>                | GCA_001516185.2 |
| <b>Pseudomonas aeruginosa W45909</b>                | GCA_001516205.2 |
| <b>Pseudomonas aeruginosa W60856</b>                | GCA_001516225.2 |
| <b>Pseudomonas aeruginosa F23197</b>                | GCA_001516245.2 |
| <b>Pseudomonas aeruginosa F30658</b>                | GCA_001516265.1 |
| <b>Pseudomonas aeruginosa H5708</b>                 | GCA_001516305.2 |
| <b>Pseudomonas aeruginosa H27930</b>                | GCA_001516325.2 |
| <b>Pseudomonas aeruginosa H47921</b>                | GCA_001516345.1 |
| <b>Pseudomonas aeruginosa M1608</b>                 | GCA_001516365.2 |
| <b>Pseudomonas aeruginosa M37351</b>                | GCA_001516385.1 |
| <b>Pseudomonas aeruginosa USDA-ARS-USMARC-41639</b> | GCA_001518975.1 |
| <b>Pseudomonas aeruginosa X78812</b>                | GCA_001542795.2 |
| <b>Pseudomonas aeruginosa F9670</b>                 | GCA_001542835.1 |
| <b>Pseudomonas aeruginosa NCGM257</b>               | GCA_001547955.1 |
| <b>Pseudomonas aeruginosa 8380</b>                  | GCA_001548135.1 |
| <b>Pseudomonas aeruginosa IOMTU 133</b>             | GCA_001548335.1 |
| <b>Pseudomonas aeruginosa F63912</b>                | GCA_001594325.2 |
| <b>Pseudomonas aeruginosa N17-1</b>                 | GCA_001606045.1 |
| <b>Pseudomonas aeruginosa ATCC 27853</b>            | GCA_001618925.1 |
| <b>Pseudomonas aeruginosa BAMCPA07-48</b>           | GCA_001632245.1 |
| <b>Pseudomonas aeruginosa PA_D1</b>                 | GCA_001721745.1 |
| <b>Pseudomonas aeruginosa PA_D2</b>                 | GCA_001721765.1 |

---

---

|                                                |                 |
|------------------------------------------------|-----------------|
| <b>Pseudomonas aeruginosa PA_D9</b>            | GCA_001721785.1 |
| <b>Pseudomonas aeruginosa PA_D16</b>           | GCA_001721805.1 |
| <b>Pseudomonas aeruginosa PA_D22</b>           | GCA_001721825.1 |
| <b>Pseudomonas aeruginosa PA_D25</b>           | GCA_001721845.1 |
| <b>Pseudomonas aeruginosa PA_D5</b>            | GCA_001722025.1 |
| <b>Pseudomonas aeruginosa PA_D21</b>           | GCA_001722045.1 |
| <b>Pseudomonas aeruginosa ATCC 15692</b>       | GCA_001729505.1 |
| <b>Pseudomonas aeruginosa FA-HZ1</b>           | GCA_001750705.1 |
| <b>Pseudomonas aeruginosa PA1088</b>           | GCA_001792835.1 |
| <b>Pseudomonas aeruginosa PA8281</b>           | GCA_001792855.1 |
| <b>Pseudomonas aeruginosa PA11803</b>          | GCA_001792875.1 |
| <b>Pseudomonas aeruginosa B10W</b>             | GCA_001874465.1 |
| <b>Pseudomonas putida DOT-T1E</b>              | GCA_000281215.1 |
| <b>Pseudomonas aeruginosa PAER4_119</b>        | GCA_001879525.1 |
| <b>Pseudomonas aeruginosa SCVFeb</b>           | GCA_001900195.1 |
| <b>Pseudomonas aeruginosa SCVJan</b>           | GCA_001900225.1 |
| <b>Pseudomonas aeruginosa Nhmuc</b>            | GCA_001900265.1 |
| <b>Pseudomonas aeruginosa PA_154197</b>        | GCA_002075065.1 |
| <b>Pseudomonas aeruginosa RIVM-EMC2982</b>     | GCA_002085605.1 |
| <b>Pseudomonas aeruginosa PASGNM699</b>        | GCA_002104595.1 |
| <b>Pseudomonas aeruginosa PASGNM345</b>        | GCA_002104615.1 |
| <b>Pseudomonas aeruginosa Pa124</b>            | GCA_002192475.1 |
| <b>Pseudomonas aeruginosa Pa58</b>             | GCA_002192495.1 |
| <b>Pseudomonas aeruginosa Pa84</b>             | GCA_002205335.1 |
| <b>Pseudomonas aeruginosa Pa127</b>            | GCA_002205355.1 |
| <b>Pseudomonas aeruginosa Pa1242</b>           | GCA_002205375.1 |
| <b>Pseudomonas aeruginosa Pa1207</b>           | GCA_002208645.1 |
| <b>Pseudomonas aeruginosa L10</b>              | GCA_002223805.1 |
| <b>Pseudomonas aeruginosa Ocean-1155</b>       | GCA_002237405.1 |
| <b>Pseudomonas aeruginosa Ocean-1175</b>       | GCA_002237425.1 |
| <b>Pseudomonas aeruginosa DK1</b>              | GCA_900069025.1 |
| <b>Pseudomonas aeruginosa PAO1_Orsay</b>       | GCA_900070375.1 |
| <b>Pseudomonas aeruginosa PA14OR</b>           | GCA_900095805.1 |
| <b>Pseudomonas aeruginosa Pcyll-10</b>         | GCA_900149285.1 |
| <b>Pseudomonas aeruginosa C-NN2</b>            | GCA_900185255.1 |
| <b>Pseudomonas aeruginosa Cu1510</b>           | GCA_001465155.1 |
| <b>Pseudomonas tolaasii 2192T</b>              | GCA_002072675.1 |
| <b>Pseudomonas agarici NCPPB 2472</b>          | GCA_001543125.1 |
| <b>Pseudomonas psychrotolerans PRS08-11306</b> | GCA_001913135.1 |
| <b>Pseudomonas mandelii JR-1</b>               | GCA_000257545.3 |

---



---

|                                                         |                 |
|---------------------------------------------------------|-----------------|
| <b>Pseudomonas citronellolis SJTE-3</b>                 | GCA_001654435.1 |
| <b>Pseudomonas simiae WCS417</b>                        | GCA_000698265.1 |
| <b>Pseudomonas frederiksbergensis ERDD5-01</b>          | GCA_001874645.1 |
| <b>Pseudomonas antarctica PAMC 27494</b>                | GCA_001647715.1 |
| <b>Pseudomonas frederiksbergensis AS1</b>               | GCA_001952935.1 |
| <b>Pseudomonas fragi NMC25</b>                          | GCA_002128325.1 |
| <b>Pseudomonas syringae pv. actinidiae ICMP 9853</b>    | GCA_000344335.2 |
| <b>Pseudomonas syringae pv. actinidiae ICMP 18708</b>   | GCA_000344355.2 |
| <b>Pseudomonas mendocina S5.2</b>                       | GCA_000733715.2 |
| <b>Pseudomonas fragi DBC</b>                            | GCA_002205455.1 |
| <b>Pseudomonas chlororaphis PCL1606</b>                 | GCA_000963835.1 |
| <b>Pseudomonas sp. VLB120</b>                           | GCA_000494915.1 |
| <b>Pseudomonas syringae CC1557</b>                      | GCA_000452705.3 |
| <b>Pseudomonas fluorescens A506</b>                     | GCA_000262325.2 |
| <b>Pseudomonas syringae pv. actinidiae ICMP 18884</b>   | GCA_000648735.3 |
| <b>Pseudomonas syringae pv. syringae HS191</b>          | GCA_000988395.1 |
| <b>Pseudomonas stutzeri RCH2</b>                        | GCA_000327065.1 |
| <b>Pseudomonas sp. MRSN12121</b>                        | GCA_000931465.1 |
| <b>Pseudomonas stutzeri 19SMN4</b>                      | GCA_000661915.1 |
| <b>Pseudomonas syringae UMAF0158</b>                    | GCA_001281365.1 |
| <b>Pseudomonas putida ND6</b>                           | GCA_000264665.1 |
| <b>Pseudomonas syringae pv. actinidiae NZ-45</b>        | GCA_001913215.1 |
| <b>Pseudomonas putida HB3267</b>                        | GCA_000325725.1 |
| <b>Pseudomonas syringae pv. actinidiae NZ-47</b>        | GCA_001913235.1 |
| <b>Pseudomonas syringae pv. actinidiae CRAFRU 12.29</b> | GCA_002024285.1 |
| <b>Pseudomonas syringae pv. actinidiae CRAFRU 14.08</b> | GCA_002024305.1 |
| <b>Pseudomonas putida S12</b>                           | GCA_000495455.2 |
| <b>Pseudomonas fluorescens L228</b>                     | GCA_001708485.1 |
| <b>Pseudomonas protegens UCT</b>                        | GCA_001874665.1 |
| <b>Pseudomonas fluorescens KENGFT3</b>                  | GCA_001602175.1 |
| <b>Pseudomonas fluorescens FW300-N2E2</b>               | GCA_001623525.1 |
| <b>Pseudomonas fluorescens CREA-C16</b>                 | GCA_001878715.1 |
| <b>Pseudomonas sp. TCU-HL1</b>                          | GCA_001708505.1 |
| <b>Pseudomonas sp. WCS374</b>                           | GCA_000698295.1 |
| <b>Pseudomonas sp. DRA525</b>                           | GCA_001908395.1 |
| <b>Pseudomonas aeruginosa PA121617</b>                  | GCA_001679685.1 |
| <b>Pseudomonas aeruginosa DN1</b>                       | GCA_001722005.2 |
| <b>Pseudomonas aeruginosa PA7790</b>                    | GCA_001870265.1 |
| <b>Pseudomonas aeruginosa E6130952</b>                  | GCA_002085755.1 |
| <b>Pseudomonas aeruginosa PA83</b>                      | GCA_002215345.1 |

---

---

|                                                      |                 |
|------------------------------------------------------|-----------------|
| <b>Pseudomonas aeruginosa PAO581</b>                 | GCA_000468555.1 |
| <b>Pseudomonas aeruginosa c7447m</b>                 | GCA_000468935.1 |
| <b>Pseudomonas aeruginosa PAO1-VE2</b>               | GCA_000484495.1 |
| <b>Pseudomonas aeruginosa PAO1-VE13</b>              | GCA_000484545.1 |
| <b>Pseudomonas aeruginosa LESlike5</b>               | GCA_000583895.1 |
| <b>Pseudomonas aeruginosa LESlike7</b>               | GCA_000583915.1 |
| <b>Pseudomonas aeruginosa LES400</b>                 | GCA_000583935.1 |
| <b>Pseudomonas aeruginosa LESB65</b>                 | GCA_000583955.1 |
| <b>Pseudomonas aeruginosa LESlike1</b>               | GCA_000583975.1 |
| <b>Pseudomonas aeruginosa LESlike4</b>               | GCA_000583995.1 |
| <b>Pseudomonas aeruginosa PA96</b>                   | GCA_000626655.2 |
| <b>Pseudomonas aeruginosa PAO1H2O</b>                | GCA_000714515.1 |
| <b>Pseudomonas aeruginosa CCBH4851</b>               | GCA_000763245.2 |
| <b>Pseudomonas aeruginosa S04 90</b>                 | GCA_000988505.1 |
| <b>Pseudomonas aeruginosa M8A1</b>                   | GCA_002116945.1 |
| <b>Pseudomonas aeruginosa M8A4</b>                   | GCA_002116985.1 |
| <b>Pseudomonas aeruginosa M28A1</b>                  | GCA_002117025.1 |
| <b>Pseudomonas aeruginosa Pb18</b>                   | GCA_002117045.1 |
| <b>Pseudomonas syringae pv. tomato str. DC3000</b>   | GCA_000007805.1 |
| <b>Pseudomonas savastanoi pv. phaseolicola 1448A</b> | GCA_000012205.1 |
| <b>Pseudomonas synxantha LMG 2190</b>                | GCA_900105675.1 |
| <b>Pseudomonas extremaustralis DSM 17835</b>         | GCA_900102035.1 |
| <b>Pseudomonas fuscovaginae LMG 2158</b>             | GCA_900108595.1 |
| <b>Pseudomonas psychrophila BS3667</b>               | GCA_900106105.1 |
| <b>Pseudomonas mucidolens LMG 2223</b>               | GCA_900106045.1 |
| <b>Pseudomonas umsongensis BS3657</b>                | GCA_900105285.1 |
| <b>Pseudomonas resinovorans NBRC 106553</b>          | GCA_000412695.1 |
| <b>Pseudomonas extremorientalis BS2774</b>           | GCA_900104365.1 |
| <b>Pseudomonas moraviensis BS3668</b>                | GCA_900105805.1 |
| <b>Pseudomonas mediterranea DSM 16733</b>            | GCA_900106005.1 |
| <b>Pseudomonas rhodesiae BS2777</b>                  | GCA_900105575.1 |
| <b>Pseudomonas xanthomarina LMG 23572</b>            | GCA_900108535.1 |
| <b>Pseudomonas lini BS3782</b>                       | GCA_900104735.1 |
| <b>Pseudomonas thivervalensis BS3779</b>             | GCA_900102295.1 |
| <b>Pseudomonas libanensis BS2975</b>                 | GCA_900101035.1 |
| <b>Pseudomonas orientalis BS2775</b>                 | GCA_900105795.1 |
| <b>Pseudomonas breunneri BS2771</b>                  | GCA_900105815.1 |
| <b>Pseudomonas cerasi PCPL58T</b>                    | GCA_900074915.1 |
| <b>Pseudomonas arsenicoxydans CECT 7543</b>          | GCA_900103875.1 |
| <b>Pseudomonas reinekei BS3776</b>                   | GCA_900104125.1 |

---

---

|                                                           |                 |
|-----------------------------------------------------------|-----------------|
| <b>Pseudomonas oryzae KCTC 32247</b>                      | GCA_900104805.1 |
| <b>Pseudomonas prosekii LMG 26867</b>                     | GCA_900105155.1 |
| <b>Pseudomonas sihuiensis KCTC 32246</b>                  | GCA_900106015.1 |
| <b>Pseudomonas litoralis 2SM5</b>                         | GCA_900105005.1 |
| <b>Pseudomonas pohangensis DSM 17875</b>                  | GCA_900105995.1 |
| <b>Pseudomonas granadensis LMG 27940</b>                  | GCA_900105485.1 |
| <b>Pseudomonas asplenii ATCC 23835</b>                    | GCA_900105475.1 |
| <b>Pseudomonas xinjiangensis NRRL B-51270</b>             | GCA_900104945.1 |
| <b>Pseudomonas salegens CECT 8338</b>                     | GCA_900105655.1 |
| <b>Pseudomonas yamanorum LMG 27247</b>                    | GCA_900105735.1 |
| <b>Pseudomonas guangdongensis CCTCC 2012022</b>           | GCA_900105885.1 |
| <b>Pseudomonas sabulinigri JCM 14963</b>                  | GCA_900105255.1 |
| <b>Pseudomonas vancouverensis BS3656</b>                  | GCA_900105825.1 |
| <b>Pseudomonas cedrina BS2981</b>                         | GCA_900104915.1 |
| <b>Pseudomonas saudiphocaensis 20_BN</b>                  | GCA_000756775.2 |
| <b>Pseudomonas antarctica BS2772</b>                      | GCA_900103795.1 |
| <b>Pseudomonas trivialis BS3111</b>                       | GCA_900104885.1 |
| <b>Pseudomonas moraviensis R28-S</b>                      | GCA_000512275.1 |
| <b>Pseudomonas corrugata BS3649</b>                       | GCA_900106085.1 |
| <b>Pseudomonas poae BS2776</b>                            | GCA_900103965.1 |
| <b>Pseudomonas mandelii LMG 21607</b>                     | GCA_900106065.1 |
| <b>Pseudomonas synxantha BG33R BG33R</b>                  | GCA_000263715.2 |
| <b>Pseudomonas azotoformans LMG 21611</b>                 | GCA_900103345.1 |
| <b>Pseudomonas koreensis BS3658</b>                       | GCA_900101415.1 |
| <b>Pseudomonas fragi NRRL B-727</b>                       | GCA_900105835.1 |
| <b>Pseudomonas brassicacearum BS3663</b>                  | GCA_900103245.1 |
| <b>Pseudomonas chlororaphis ATCC 13985</b>                | GCA_900104715.1 |
| <b>Pseudomonas chlororaphis LMG 21630</b>                 | GCA_900104985.1 |
| <b>Pseudomonas chlororaphis DSM 21509</b>                 | GCA_900104995.1 |
| <b>Pseudomonas chlororaphis O6</b>                        | GCA_000264555.1 |
| <b>Pseudomonas chlororaphis subsp. aureofaciens 30-84</b> | GCA_000281915.1 |
| <b>Pseudomonas syringae 31R1</b>                          | GCA_900105295.1 |
| <b>Pseudomonas syringae pv. syringae B64</b>              | GCA_000331385.1 |
| <b>Pseudomonas syringae pv. syringae SM</b>               | GCA_000412165.1 |
| <b>Pseudomonas syringae pv. actinidiae ICMP 9617</b>      | GCA_000658965.1 |
| <b>Pseudomonas fluorescens WH6</b>                        | GCA_000166515.1 |
| <b>Pseudomonas fluorescens SS101</b>                      | GCA_000263675.2 |
| <b>Pseudomonas putida N1R</b>                             | GCA_900156185.1 |
| <b>Pseudomonas fluorescens Q8r1-96</b>                    | GCA_000263695.2 |
| <b>Pseudomonas fluorescens Q2-87</b>                      | GCA_000281895.1 |

---

---

|                                          |                 |
|------------------------------------------|-----------------|
| <b>Pseudomonas fluorescens R124</b>      | GCA_000292795.1 |
| <b>Pseudomonas sp. MT-1</b>              | GCA_000828755.1 |
| <b>Pseudomonas sp. Z003-0.4C-8344-21</b> | GCA_900104975.1 |
| <b>Pseudomonas sp. bs2935</b>            | GCA_900105085.1 |
| <b>Pseudomonas sp. B10</b>               | GCA_900156235.1 |
| <b>Pseudomonas sp. A214</b>              | GCA_900156295.1 |
| <b>Pseudomonas sp. 7SR1</b>              | GCA_900156465.1 |
| <b>Pseudomonas aeruginosa PSE305</b>     | GCA_000750905.1 |
| <b>Pseudomonas aeruginosa 39016</b>      | GCA_000148745.1 |
| <b>Pseudomonas aeruginosa PACS2</b>      | GCA_000168335.1 |
| <b>Pseudomonas aeruginosa 19BR</b>       | GCA_000223945.2 |
| <b>Pseudomonas aeruginosa 213BR</b>      | GCA_000223965.2 |
| <b>Azotobacter vinelandii CA</b>         | GCA_000380335.1 |

---
